# Supplementary material for: Controlled synthesis and luminescent properties of monodispersed PEI-modified YVO4:Bi3+,Eu3+ nanocrystals by a facile hydrothermal process
Source: Royal Society of Chemistry journal article supplement (doi:10.1039/c2jm30756a), 2012-01-01
Supplement: c2jm30756a.pdf [file c2jm30756a.pdf]

## Supplementary Information

# **Controlled Synthesis and Luminescent Properties of Monodispersed $\text{YVO}_4:\text{Bi}^{3+}$ , $\text{Eu}^{3+}$ Nanocrystals by a Facile PEI-modified Hydrothermal Process**

Yi-Chin Chen, Yun-Chen Wu, De-Yin Wang and Teng-Ming Chen \*

*Phosphors Research Laboratory, Department of Applied Chemistry and Institute of  
Molecular Science, National Chiao Tung University, Hsinchu 30010, Taiwan.*

E-mail: [tmchen@mail.nctu.edu.tw](mailto:tmchen@mail.nctu.edu.tw); Phone: +886-3-5731695.

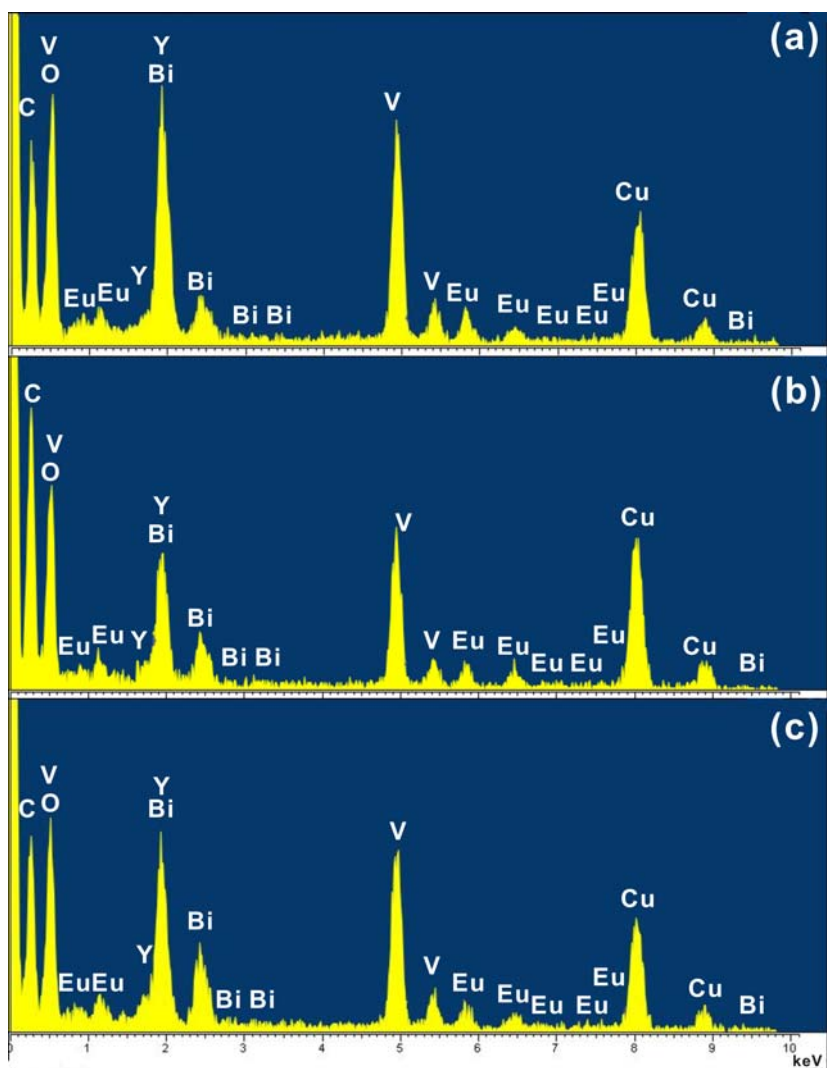

Fig. S1 EDX spectrum of YVO<sub>4</sub>:Bi<sup>3+</sup>, Eu<sup>3+</sup> nanocrystals synthesized with high molecular weight BPEI polymer under different pH conditions. (a) pH = 4, (b) pH = 7, and (c) pH = 11.

**Table S1.** EDX spectrum analysis of  $(Y_{0.7}Bi_{0.15}Eu_{0.15})VO_4$  nanocrystals at different pH conditions.

| Element | Atomic % |        |         | theoretical value |
|---------|----------|--------|---------|-------------------|
|         | pH 4.0   | pH 7.0 | pH 11.0 |                   |
| Y       | 21.62    | 10.75  | 10.20   | 11.67             |
| V       | 24.12    | 12.33  | 12.54   | 16.66             |
| O       | 50.30    | 73.43  | 73.84   | 66.67             |
| Eu      | 2.54     | 1.74   | 1.63    | 2.5               |
| Bi      | 1.42     | 1.75   | 1.80    | 2.5               |
| total   | 100      | 100    | 100     | 100               |
